# Supplementary material for: Epidemiology of Turbot (Scophthalmus maeoticus) Bacterial Contamination, a Fishery Limiting Factor on the Romanian Black Sea
Source: MDPI journal article supplement (doi:10.3390/fishes8080418), 2023-08-15
Supplement: s1 [file s1]

Supplementary Material. Ichthyopathological maps of bacterial infestation in Romanian Black Sea turbot.

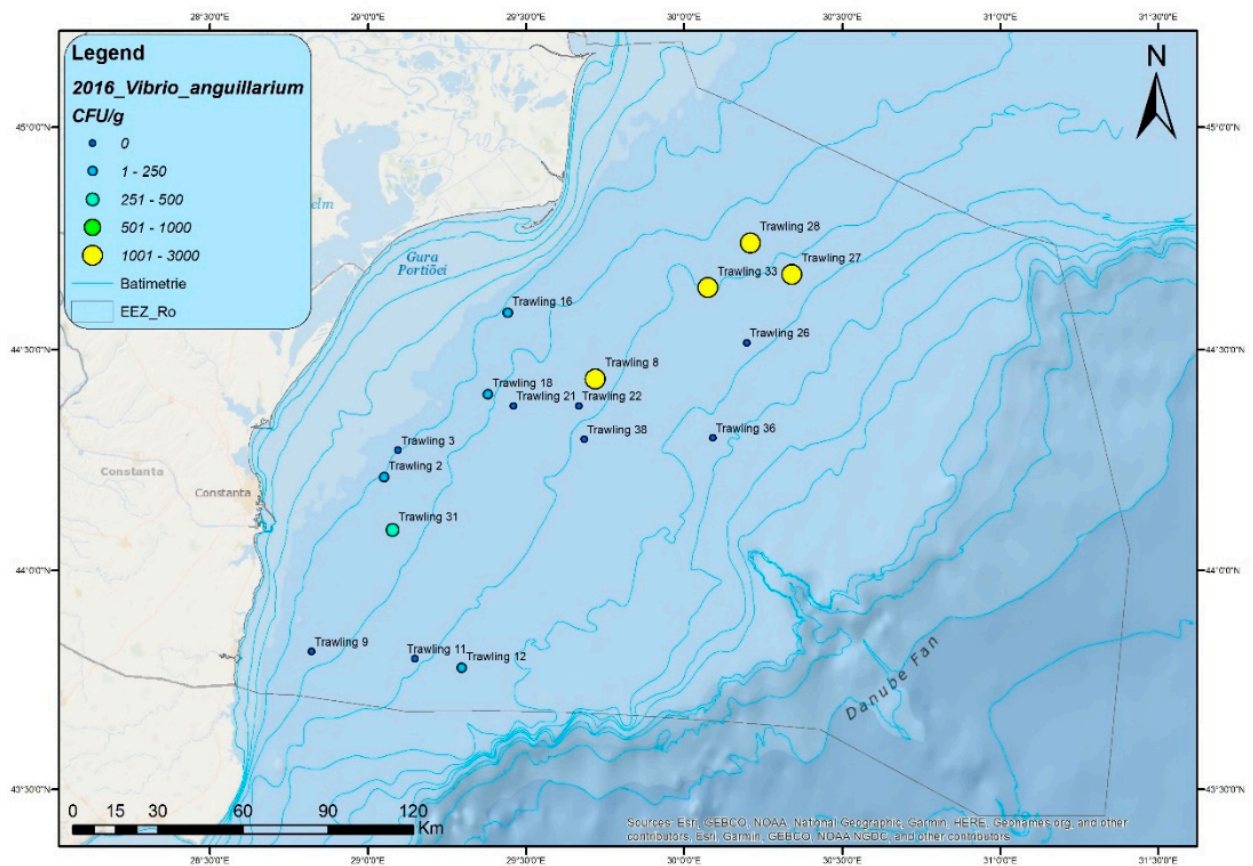

Figure S1. Number of *V. anguillarum* colonies (CFU/g) in 2016

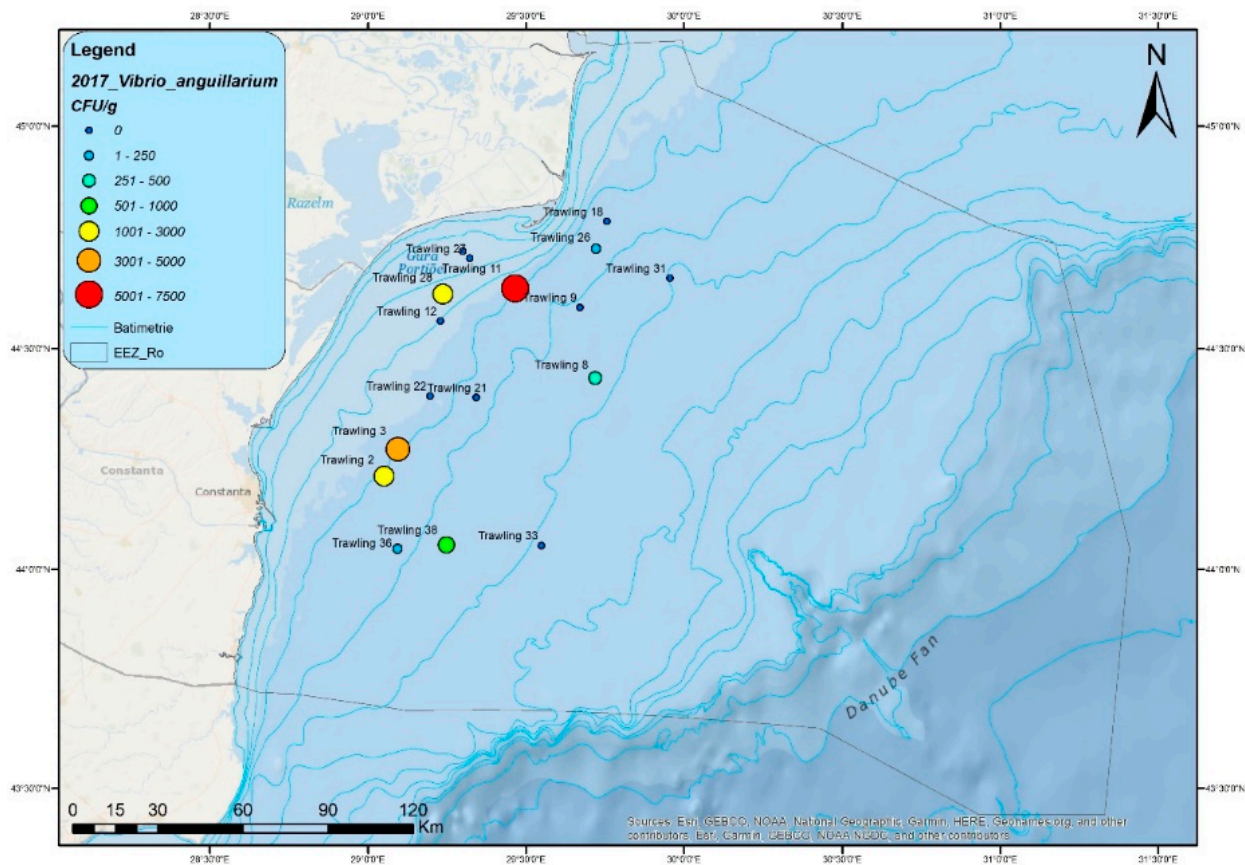

**Figure S2.** Number of *V. anguillarum* colonies (CFU/g) in 2017

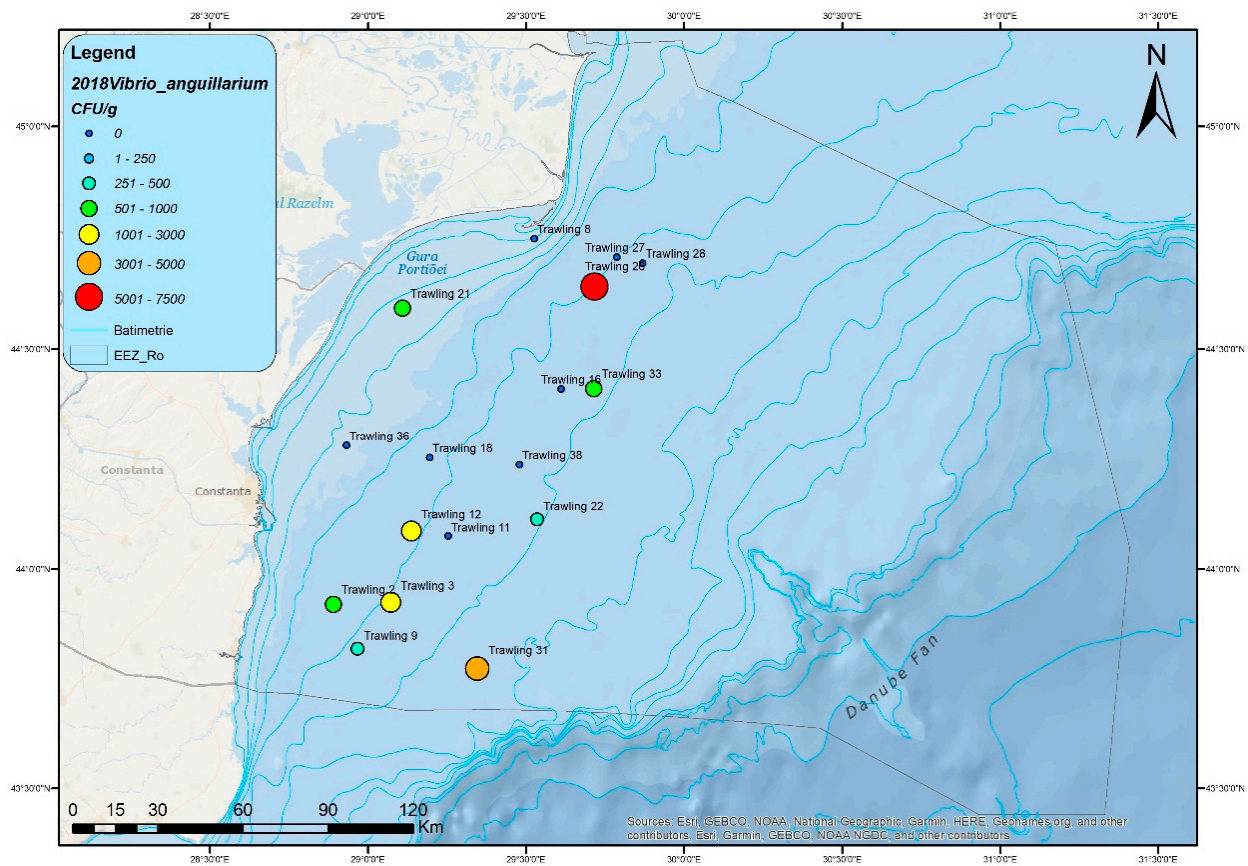

**Figure S3.** Number of *V. anguillarum* colonies (CFU/g) in 2018

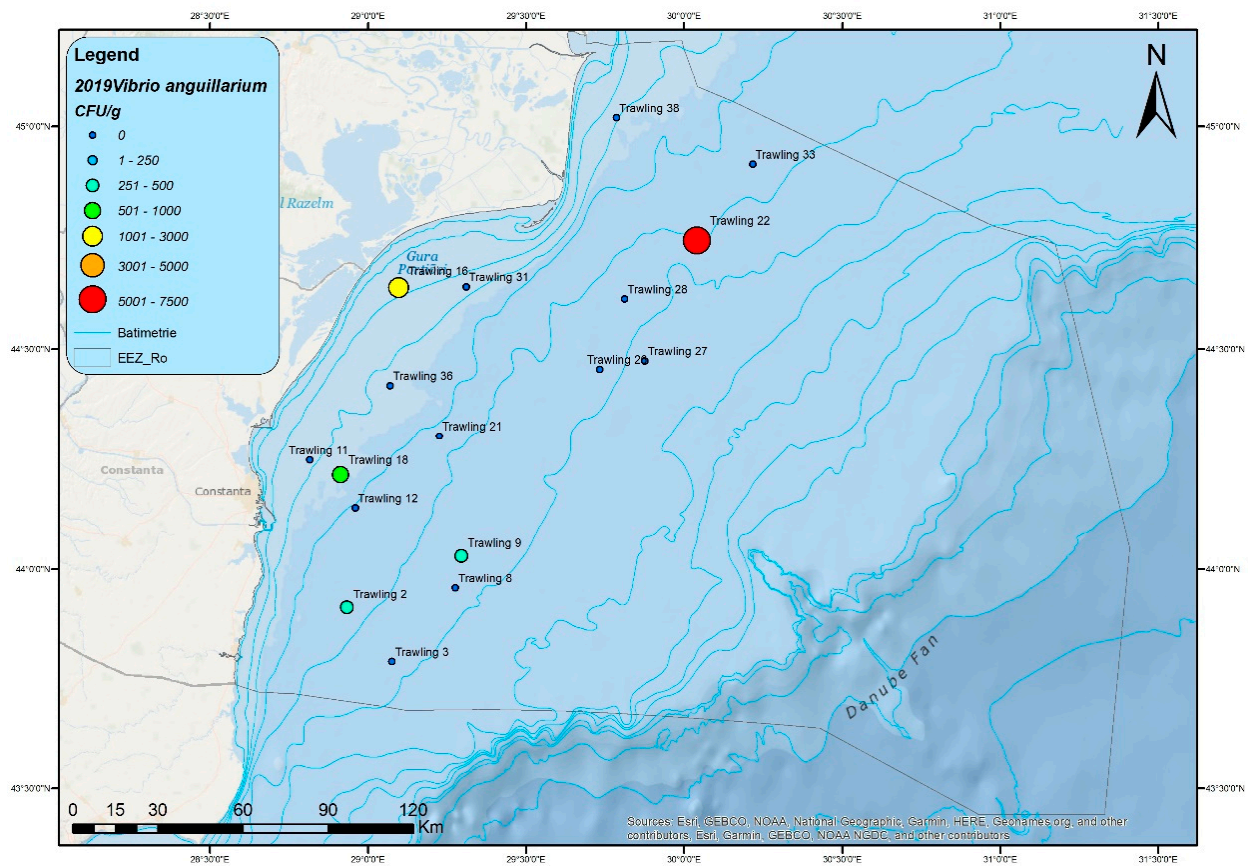

**Figure S4.** Number of *V. anguillarum* colonies (CFU/g) in 2019



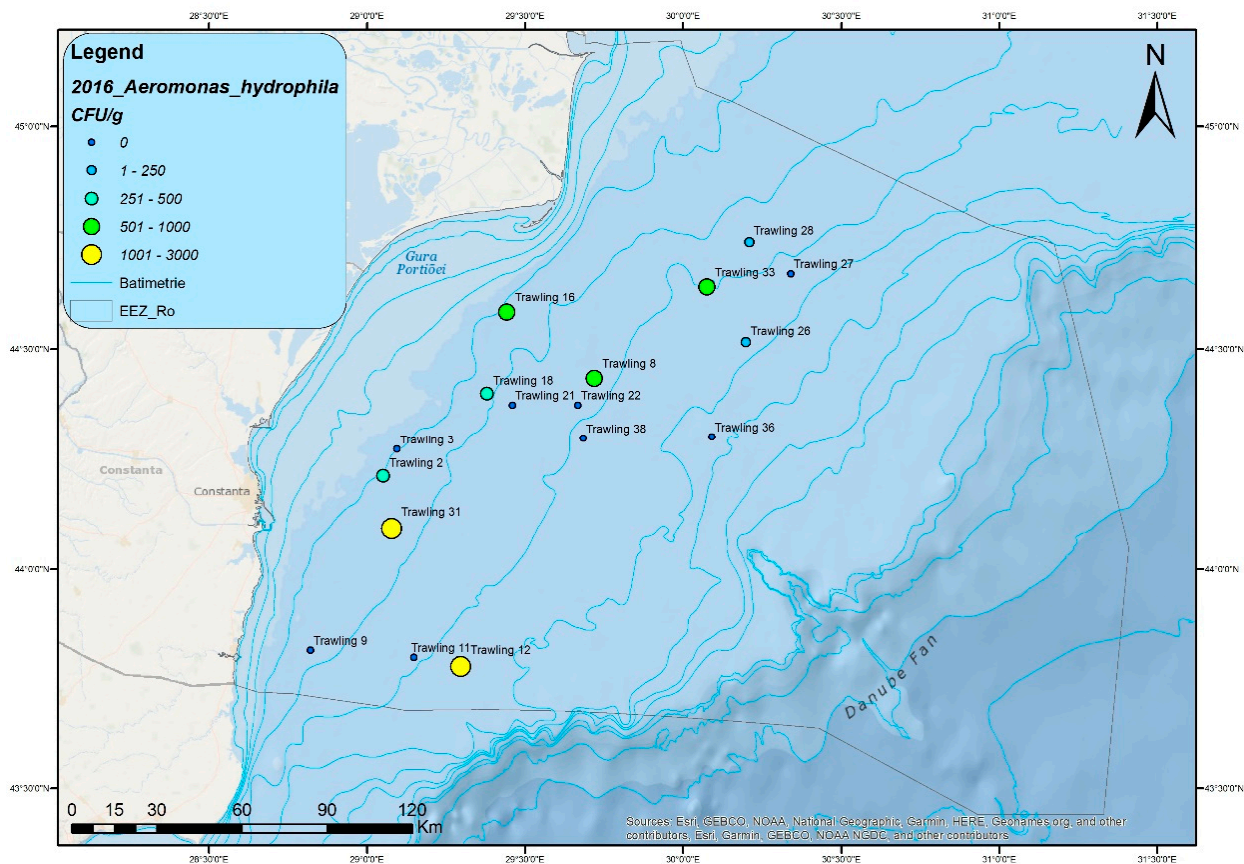

Figure S5. Number of *A. hydrophila* colonies (CFU/g) in 2016

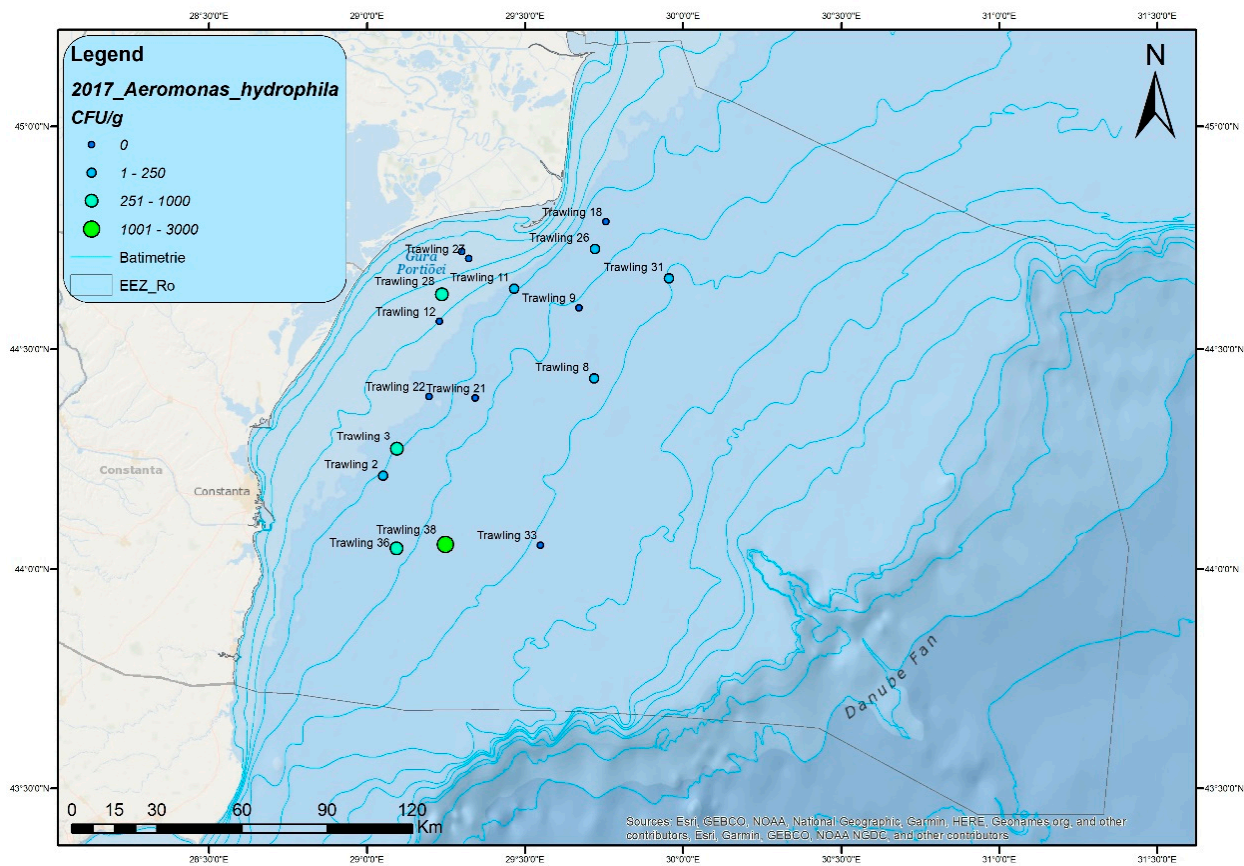

**Figure S6.** Number of *A. hydrophila* colonies (CFU/g) in 2017

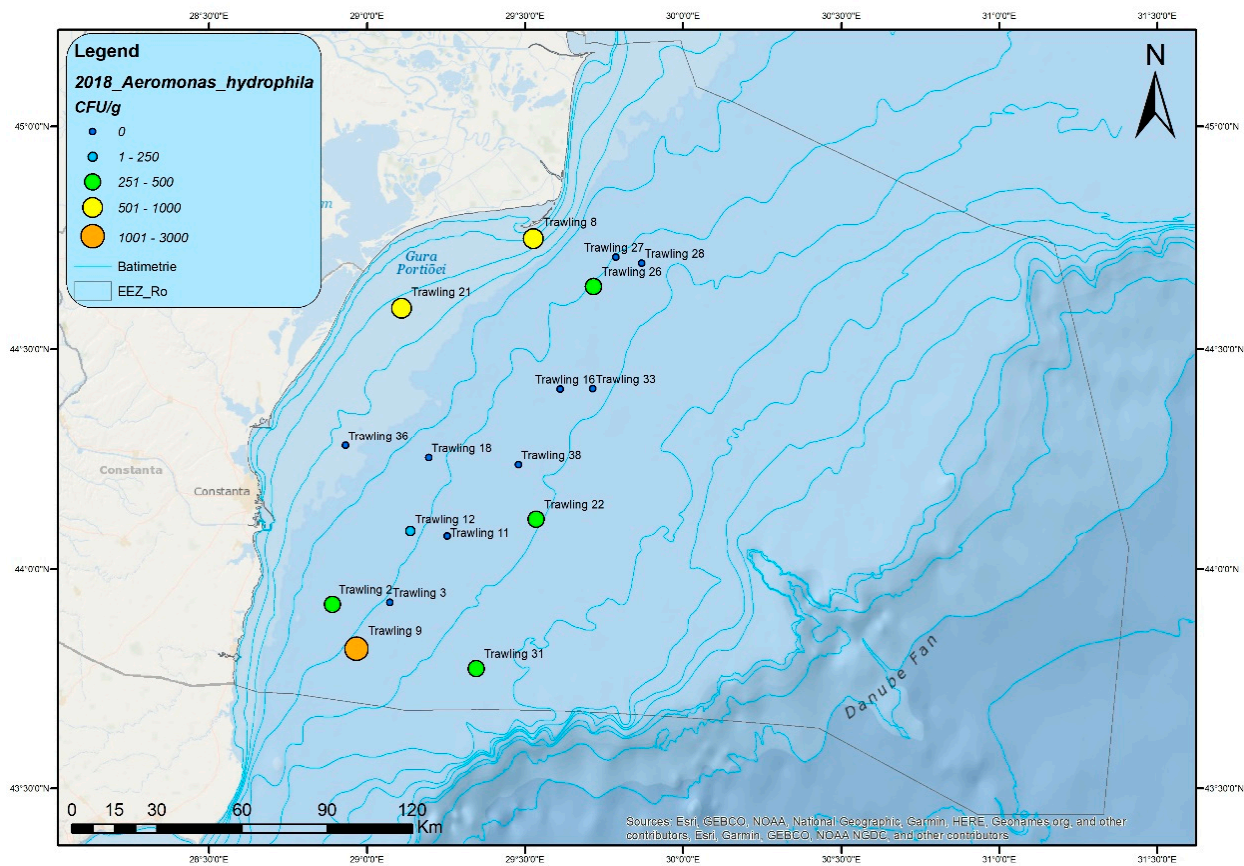

**Figure S7.** Number of *A. hydrophila* colonies (CFU/g) in 2018

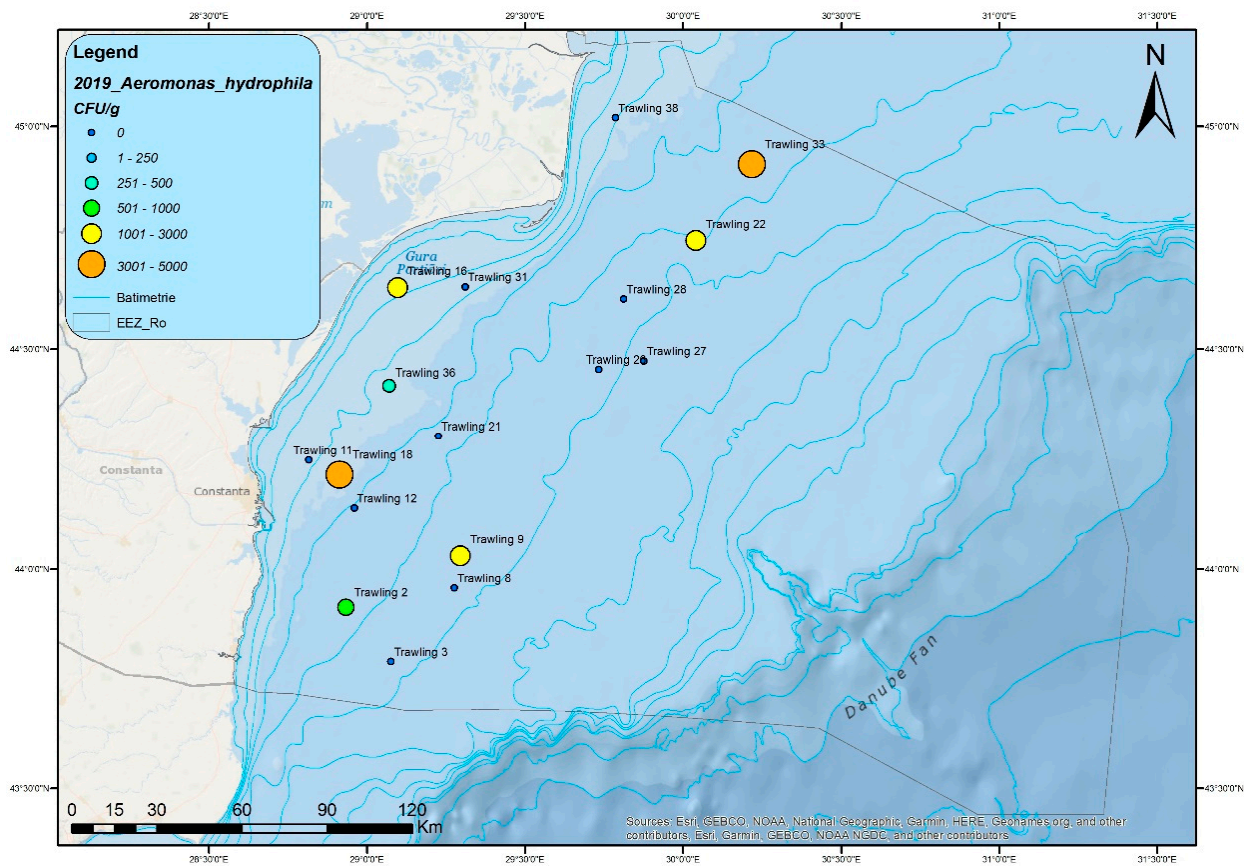

**Figure S8.** Number of *A. hydrophila* colonies (CFU/g) in 2019



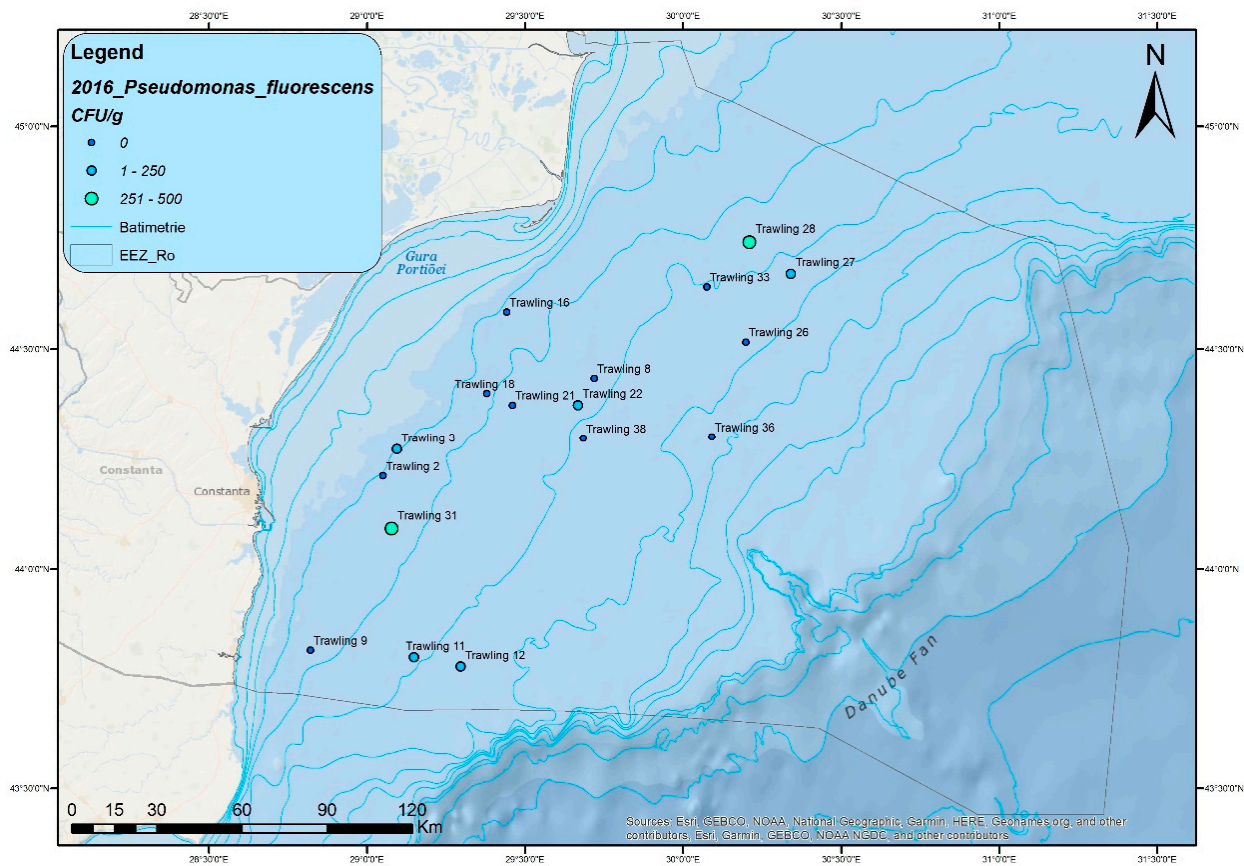

**Figure S9.** Number of *P. fluorescens* colonies (CFU/g) in 2016

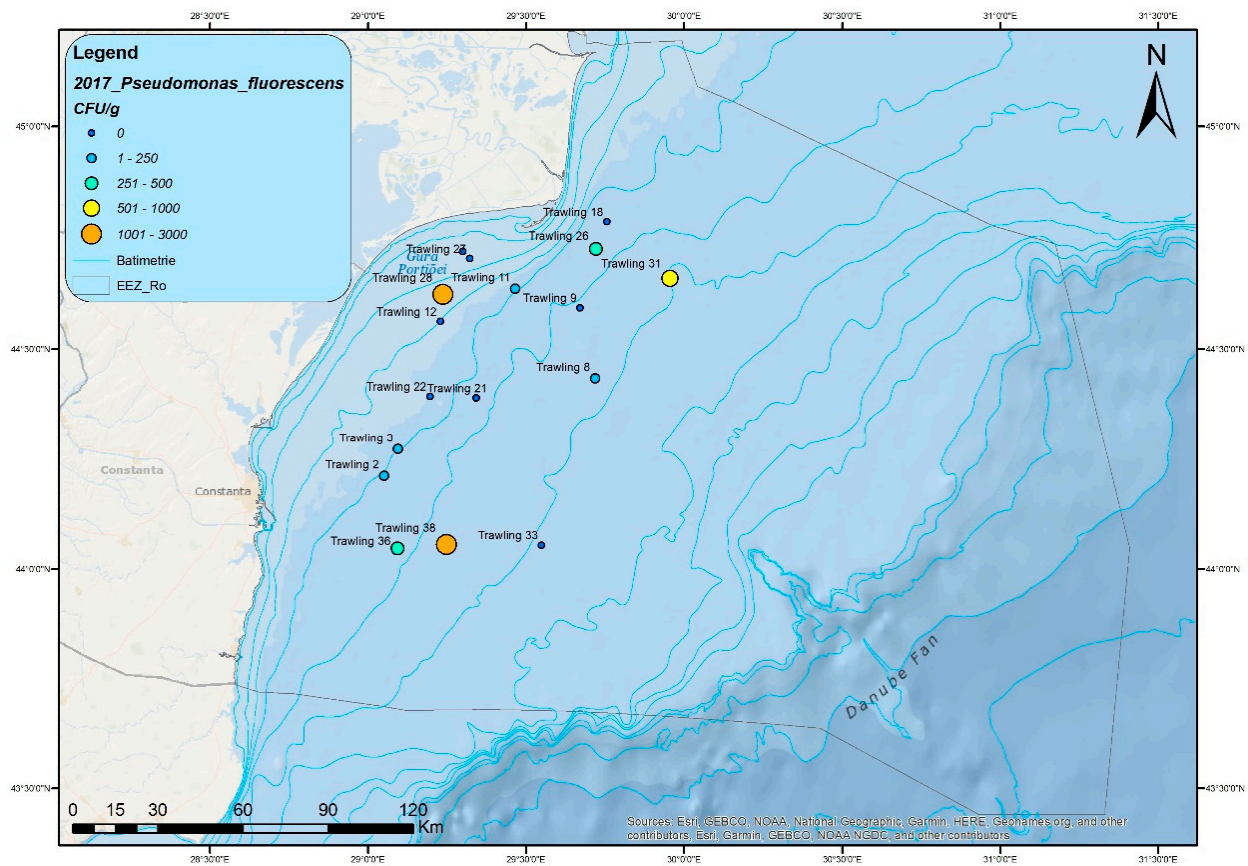

**Figure S10.** Number of *P. fluorescens* colonies (CFU/g) in 2017

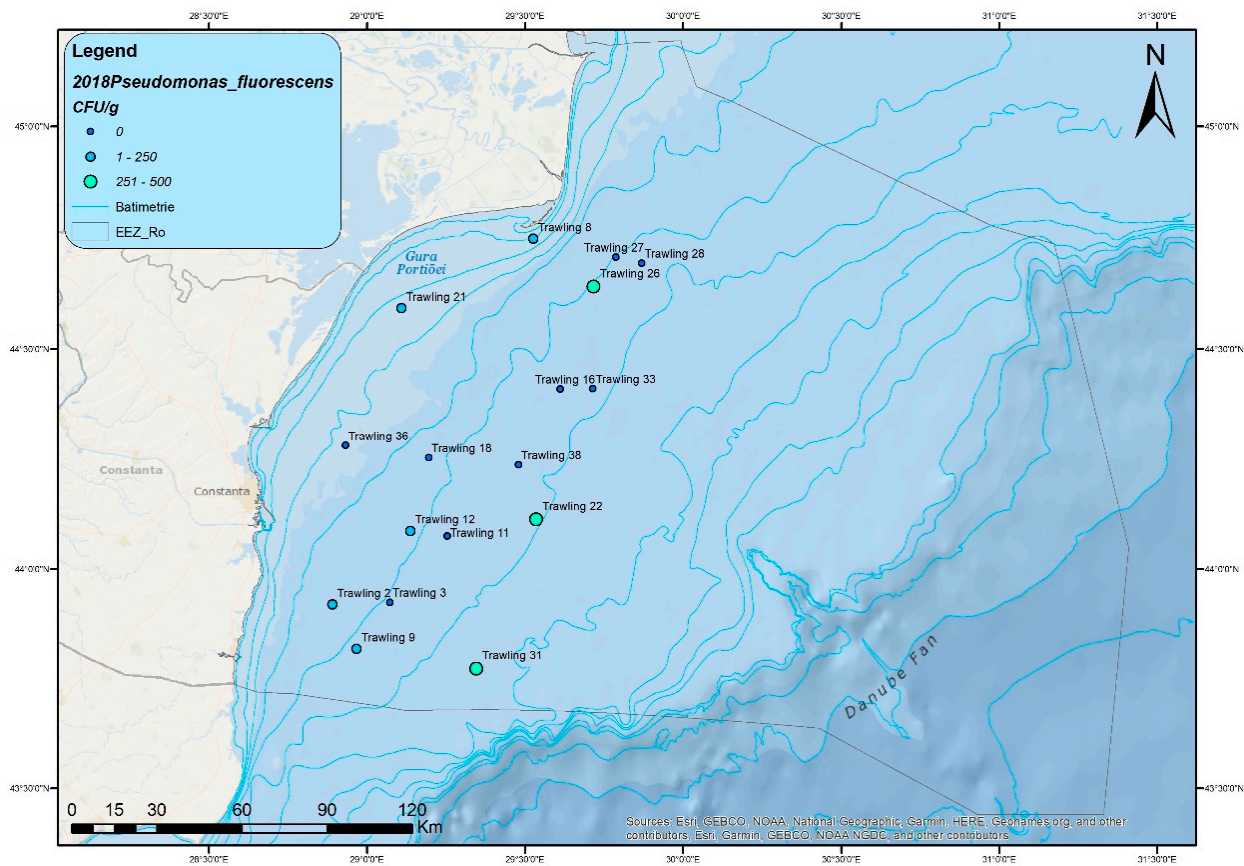

**Figure S11.** Number of *P. fluorescens* colonies (CFU/g) in 2018

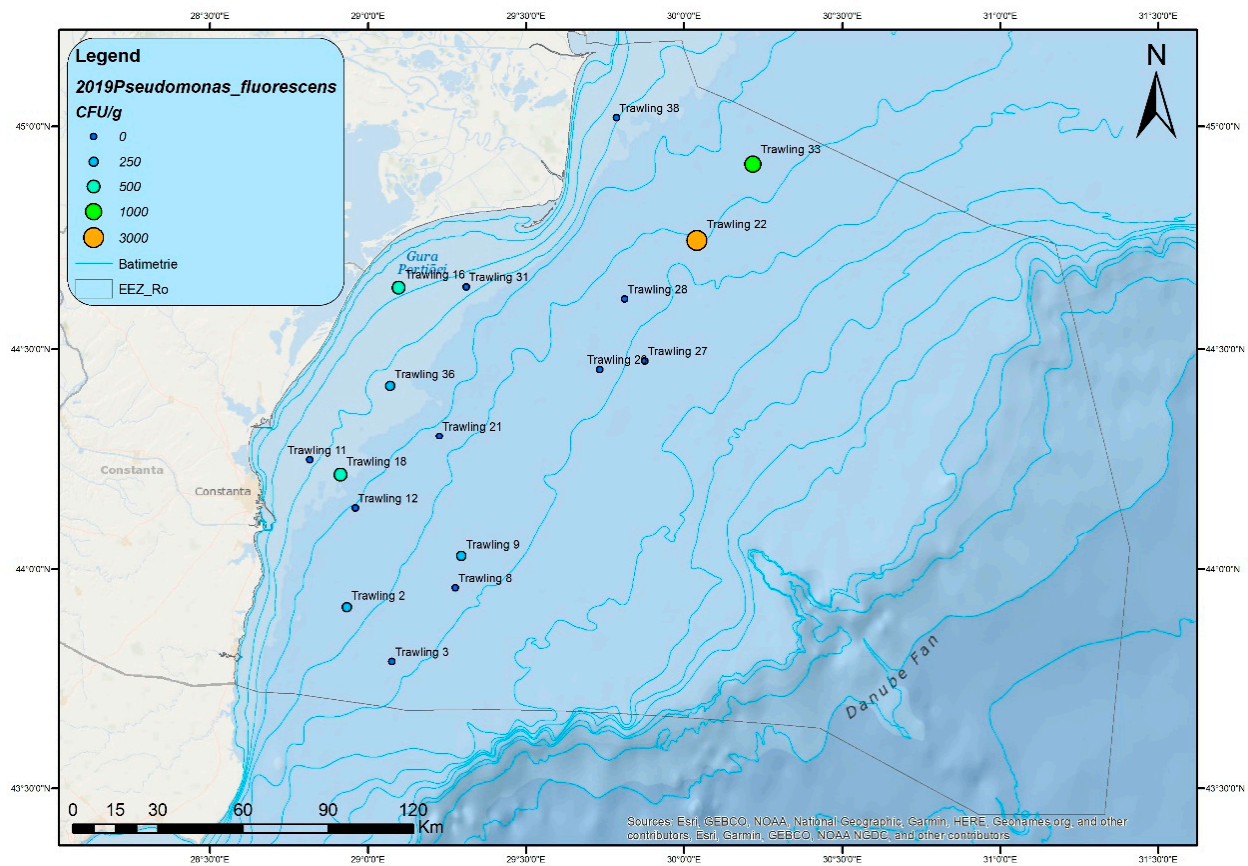

**Figure S12.** Number of *P. fluorescens* colonies (CFU/g) in 2019
